# Supplementary material for: Deubiquitinase DUB3 Regulates Cell Cycle Progression via Stabilizing Cyclin A for Proliferation of Non-Small Cell Lung Cancer Cells
Source: PubMed Central journal article supplement (PMC6523561; doi:10.3390/cells8040297), 2019-03-31
Supplement: cells-08-00297-s001.pdf [file cells-08-00297-s001.pdf]

## Supplementary Figures

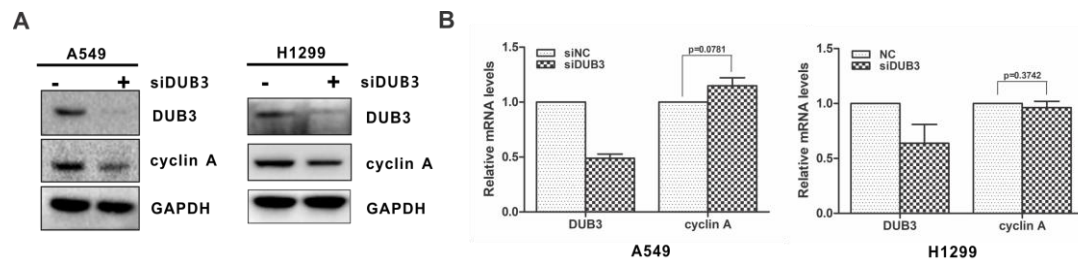

**Figure S1.** (A) A549 and H1299 cells were transfected with either scrambled or DUB3 siRNAs for 48 h. The resulting cell extracts were analyzed by Western blotting with anti-DUB3, anti-cyclin A, or anti-GAPDH antibody. (B) A549 and H1299 cells were transfected with either scrambled or DUB3 siRNAs for 48 h, and then total RNA was isolated and subjected to qRT-PCR. The error bars represent the SD of triplicate measurements.

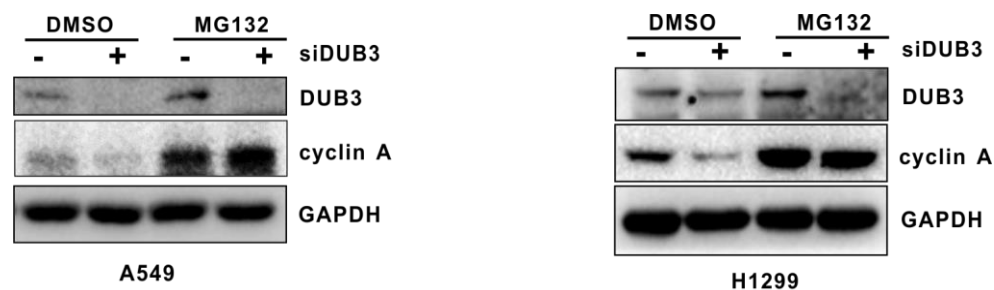

**Figure S2** A549 and H1299 cells transfected with either scrambled or DUB3 siRNAs were treated with DMSO or MG132 (20 $\mu$ M) for 6 h, and the indicated proteins were analyzed by Western blotting.

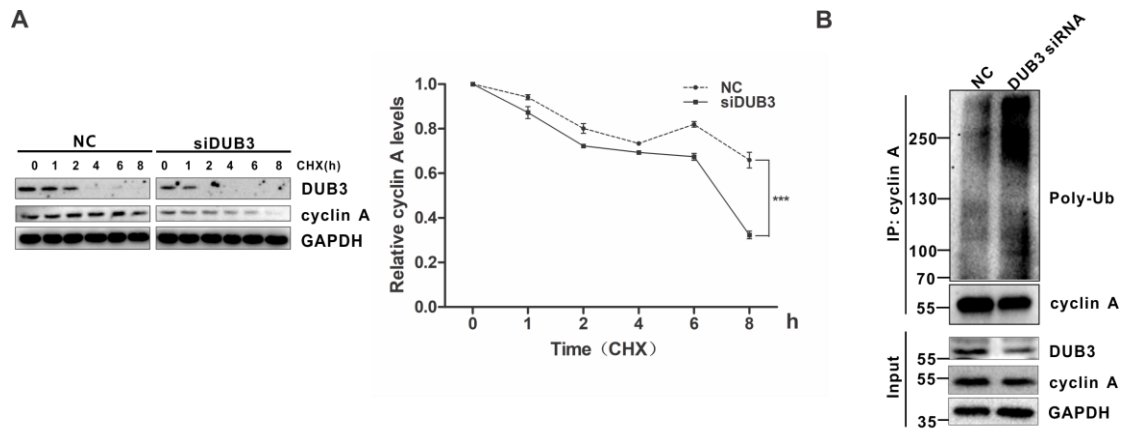

**Figure S3** (A) A549 cells transfected with either scrambled or DUB3 siRNAs were treated with  $50 \mu\text{g}\cdot\text{mL}^{-1}$  CHX and then collected at the indicated time points for Western blot analysis. Quantification of the cyclin A levels relative to GAPDH expression is shown. Data represent the mean ( $\pm$  S.D.) of three independent experiments (\*\* $p < 0.001$ ). (B) A549 cells transfected with either scrambled or DUB3 siRNAs were treated with MG132 ( $20 \mu\text{M}$ ) for 6 h before harvest. cyclin A was immunoprecipitated with an anti-cyclin A antibody, and the immunoprecipitates were probed with anti-Ub or anti-cyclin A antibody.

**A**

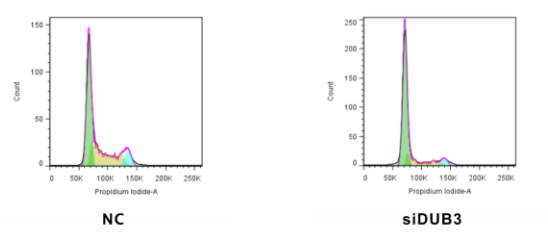

|                | NC                  | siDUB3              |
|----------------|---------------------|---------------------|
| <b>G0/G1 %</b> | <b>53.42 ± 1.17</b> | <b>75.62 ± 0.94</b> |
| <b>S%</b>      | <b>34.38 ± 1.13</b> | <b>18.25 ± 0.29</b> |
| <b>G2/M%</b>   | <b>12.21 ± 0.04</b> | <b>6.13 ± 1.23</b>  |

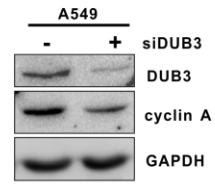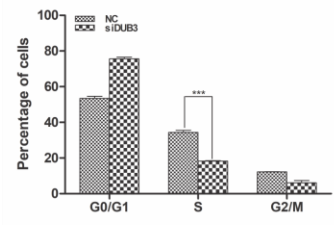

**B**

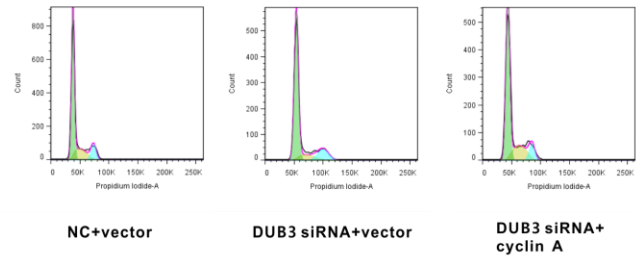

|                | NC+vector           | siDUB3+vector       | siDUB3+cyclin A     |
|----------------|---------------------|---------------------|---------------------|
| <b>G0/G1 %</b> | <b>63.96 ± 0.65</b> | <b>73.94 ± 1.12</b> | <b>64.63 ± 0.94</b> |
| <b>S%</b>      | <b>24.14 ± 1.54</b> | <b>11.2 ± 1.68</b>  | <b>24.18 ± 2.08</b> |
| <b>G2/M%</b>   | <b>11.9 ± 0.89</b>  | <b>14.86 ± 0.56</b> | <b>11.19 ± 1.14</b> |

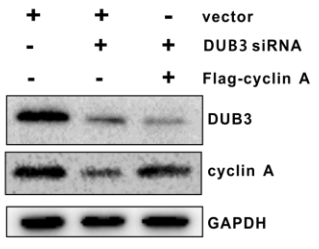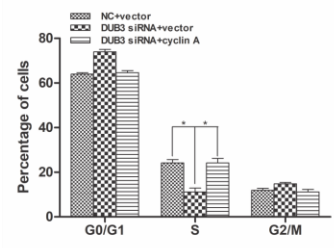

**Figure S4.** A549 cells transfected with either scrambled or DUB3 siRNAs were stained with propidium iodide and analyzed using flow cytometry. Data represent the mean ( $\pm$  S.D.) of three independent experiments (\*  $p < 0.05$  and \*\*\*  $p < 0.001$ ).

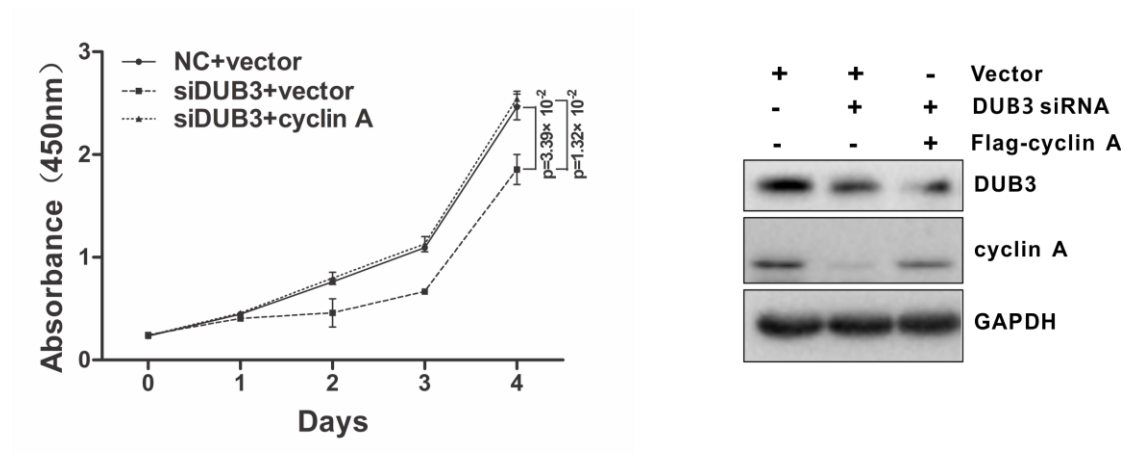

**Figure S5.** A549 cells were transfected with either scrambled or DUB3 siRNAs and then transfected with the indicated constructs. Cell proliferation was monitored using CCK-8 assays at the indicated time points. Statistical significance was determined by a two-tailed, unpaired Student's t test.
